# Supplementary material for: Zenocutuzumab, a HER2xHER3 Bispecific Antibody, Is Effective Therapy for Tumors Driven by NRG1 Gene Rearrangements
Source: Oxford University Press journal article supplement (doi:10.1158/2159-8290.cd-21-1119), 2022-02-08
Supplement: cd-21-1119_supplementary_table_2_supp2.xlsx [file cd-21-1119_supplementary_table_2_supp2.xlsx]

## Sheet: Table S2
	Antibody, Species	Supplier, Clone
	Phospho-S6 S240/244 Rabbit	Cell Signaling Technology D68F8
	Phospho-S6 S235/236 Rabbit	Cell Signaling Technology D5722E
	S6 Mouse	Cell Signaling Technology 54D2
	PUMA Rabbit	Cell Signaling Technology 4976
	BIM Rabbit	Cell Signaling Technology C34C5
	Phospho-ERBB3 Y1289 Rabbit	Cell Signaling Technology 21D3
	ERBB3 Rabbit	Cell Signaling Technology D22C5
	Phospho-ERBB2 Y1196 Rabbit	Cell Signaling Technology D66B7
	ERBB2 Rabbit	Cell Signaling Technology D8F12
	STAT3 Mouse	Cell Signaling Technology 124H6
	STAT3 S727 Rabbit	Cell Signaling Technology D8C2Z
	Phospho-EGFR Y1068 Rabbit	Cell Signaling Technology D7A5
	GAPDH, HRP Rabbit	Cell Signaling Technology D16H11
	AKT (pan) Rabbit	Cell Signaling Technology C67E7
	Phospho-MEK 1/2 S217/221 Rabbit	Cell Signaling Technology 41G9
	MEK 1/2 Mouse	Cell Signaling Technology L38C12
	Phopho-P70S6K T421/S424 Rabbit	Cell Signaling Technology, polyclonal
	P70S6K Rabbit	Cell Signaling Technology polyclonal
	Phospho-ERBB3 Y1289 Rabbit	Cell Signaling Technology 21D3
	Phospho-ERBB4 Y1284 Rabbit	Cell Signaling Technology 21A9
	ERBB4 Rabbit	CST, 111B2
	ERK1/2 Rabbit	Cell Signaling Technology polyclonal
	pERK1/2 T202/Y204 Rabbit	Cell Signaling Technology 197G2
	Cyclin D1 Rabbit	Cell Signaling Technology E3P5S
	NRG1 Rabbit	Cell Signaling Technology 2573
	Vinculin Rabbit	Cell Signaling Technology E1E9V
	Supplementary Table S2. Antibodies used in Western blot experiments. All antibodies were used at a 1:1000 dilution
